# Supplementary material for: Contrasting Effect of Thinning and Understory Removal on Soil Microbial Communities in a Subtropical Moso Bamboo Plantation
Source: MDPI journal article supplement (doi:10.3390/f13101574), 2022-09-26
Supplement: s1 [file s1]

## Supplementary Materials

**Table S1.** Soil physic-chemical properties at 0-5cm depth in Feb, May, and Aug in 2018 as affected by thinning, understory removal, and their interaction. SWC (%), pH, AP(mg/kg), TN(g/kg), TP(g/kg), SOC(g/kg) stand for soil water content, soil pH, soil available phosphorus content, soil total nitrogen, soil total phosphorus, and soil organic carbon, respectively. NO<sub>3</sub><sup>-</sup>(mg/kg), NH<sub>4</sub><sup>+</sup>(mg/kg), C:N, C:P, N:P stand for soil nitrate content, soil ammonium content, and stoichiometric ratios among soil organic carbon, total nitrogen, and total phosphorus, respectively.

Note: Values are means ± SE, n=4. For comparisons of treatments, means followed by different lowercase letters in a column are significantly different ( $P < 0.05$ ) by LSD test.

| Time | Treatments | SWC (%)    | pH (unit)  | AP (mg/kg) | NO3- (mg/kg) | NH4+ (mg/kg) | TN (g/kg) | TP (g/kg)  | SOC (g/kg) | C:N        | C:P          | N:P        |
|------|------------|------------|------------|------------|--------------|--------------|-----------|------------|------------|------------|--------------|------------|
| Feb  | CK         | 29.2±2.32a | 4.7±0.14a  | 13.5±0.67c | 3.7±0.42c    | 15.0±1.83a   | 3.5±0.93a | 0.19±0.04c | 31.0±5.46a | 9.2±1.75a  | 175.7±72.81a | 19.8±8.27a |
|      | UR         | 24.4±2.42c | 4.9±0.25a  | 18.6±1.72a | 5.1±0.39b    | 21.9±0.35d   | 3.8±0.19a | 0.18±0.03d | 34.8±7.49a | 9.3±2.43a  | 208.0±67.47a | 22.3±3.48a |
|      | Th         | 27.4±1.25b | 4.5±0.20a  | 13.2±1.32d | 6.1±0.19a    | 26.7±3.93c   | 2.9±0.21a | 0.24±0.04b | 31.3±4.71a | 10.8±2.03a | 136.1±39.97a | 12.8±3.83a |
|      | TUR        | 18.4±1.79d | 4.5±0.10a  | 18.4±1.48d | 6.3±1.73a    | 31.5±3.98b   | 4.1±0.26a | 0.36±0.03a | 34.3±4.97a | 8.4±1.22a  | 96.0±14.45a  | 11.5±1.64a |
|      | Average    | 24.9±4.10B | 4.7±0.17A  | 15.9±2.58B | 5.0±0.85C    | 23.8±6.10B   | 3.6±0.44C | 0.24±0.07B | 32.9±1.71B | 9.4±0.86B  | 154.1±42.04A | 16.6±4.56A |
| May  | CK         | 41.9±0.46a | 4.9±0.01a  | 14.3±1.39d | 7.8±0.92c    | 31.1±3.71c   | 4.5±0.19d | 0.57±0.08b | 31.6±6.37a | 7.0±1.58a  | 57.4±17.64a  | 8.1±1.10c  |
|      | UR         | 39.7±3.13a | 5.0±0.13a  | 28.0±0.39a | 7.1±1.00d    | 24.2±2.97d   | 4.6±0.08c | 0.49±0.06d | 31.7±7.93a | 7.0±1.85a  | 67.2±24.40a  | 9.4±1.06b  |
|      | Th         | 42.2±2.11a | 4.7±0.23a  | 17.4±3.09c | 10.6±1.42a   | 43.0±2.74a   | 5.2±0.22b | 0.67±0.01a | 33.1±4.47a | 6.5±1.10a  | 45.1±8.71a   | 7.0±0.75d  |
|      | TUR        | 39.8±0.62a | 4.6±0.19a  | 19.0±2.53b | 8.2±0.71b    | 33.6±2.78b   | 6.2±0.21a | 0.55±0.09c | 34.6±4.07a | 5.6±0.84a  | 65.0±12.27a  | 11.5±1.52a |
|      | Average    | 40.9±1.16A | 4.8±0.16A  | 20.0±5.51A | 7.9±1.65A    | 33.0±6.73A   | 5.1±0.68B | 0.57±0.06A | 32.8±1.22B | 6.5±0.57C  | 58.7±8.64C   | 9.0±1.67C  |
| Aug  | CK         | 32.5±1.47a | 5.4±0.08a  | 5.1±0.20a  | 7.3±0.42a    | 8.0±0.80c    | 4.6±0.39d | 0.48±0.04a | 48.4±4.12d | 13.0±2.88a | 102.5±16.55a | 8.3±1.97d  |
|      | UR         | 25.2±0.74d | 4.60±0.02b | 5.9±0.57a  | 6.9±0.67b    | 4.7±1.12d    | 5.1±0.44c | 0.42±0.05a | 54.8±2.79b | 12.6±3.21a | 133.0±13.65a | 11.4±3.40b |
|      | Th         | 30.8±1.39b | 4.5±0.05c  | 3.9±2.07a  | 7.3±0.46a    | 15.6±0.84a   | 6.4±0.33b | 0.53±0.12a | 54.7±6.01c | 11.6±3.85a | 111.0±33.85a | 9.7±1.22c  |
|      | TUR        | 27.2±2.75c | 4.50±0.06d | 4.3±0.98a  | 7.8±1.02a    | 15.5±1.88b   | 8.3±0.40a | 0.47±0.06a | 65.2±2.31a | 9.5±1.42a  | 140.0±14.29a | 15.1±2.85a |
|      | Average    | 28.9±2.88B | 4.75±0.38A | 5.0±0.50C  | 7.3±0.33B    | 11.0±4.75C   | 6.1±1.43A | 0.48±0.04A | 55.8±6.03A | 11.7±1.36A | 121.6±15.38B | 11.1±2.54B |

For comparisons of soil properties average across sampling time, average means in the bottom rows followed by different upper case letter are significantly different ( $P < 0.05$ ). Th, thinning; UR, understory removal; Th × UR, interactions between thinning and understory removal.

**Table S2.** Statistical significance and variance explained by the variables selected according to the redundancy analysis (RDA). The statistical significance was determined at  $p \leq 0.05$ .

| <b>Variables</b>                | <b><i>P</i></b> | <b>Variance explained</b> |
|---------------------------------|-----------------|---------------------------|
| NH <sub>4</sub> <sup>+</sup> -N | 0.002           | 55%                       |
| NO <sub>3</sub> -N              | 0.03            | 57%                       |
| SWC                             | 0.04            | 52%                       |
| pH                              | 0.05            | 60%                       |
